# Supplementary material
Source: ML conference proceedings conference paper supplement (https://openreview.net/forum?id=xPaPd6g5WG)

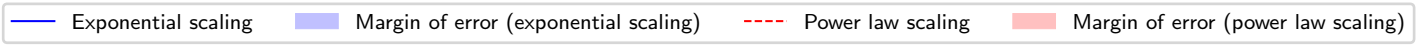

Supplement: supplementary_material [file legend_bar.pdf › exponential_scaling/legend_bar.pdf]
